# Supplementary material for: Change in fracture risk and fracture pattern after bariatric surgery: nested case-control study
Source: PubMed Central journal article supplement — BMJ. 2016 Jul 27;354:i3794. doi: 10.1136/bmj.i3794 (PMC4964103; doi:10.1136/bmj.i3794), 2016-07-27
Supplement: gagc031922.ww1_default.pdf [file gagc031922.ww1_default.pdf]

**Appendix 1. List of diagnostic, intervention, and medical service billing codes used to select individuals in the three groups.**

| <b>Obesity</b>           | <b>ICD-9-CM diagnostic codes</b>                        | <b>ICD-10-CA diagnostic codes</b>                                                                                                                                |
|--------------------------|---------------------------------------------------------|------------------------------------------------------------------------------------------------------------------------------------------------------------------|
|                          | 278.0 and 278.9                                         | E65-E66                                                                                                                                                          |
| <b>Bariatric surgery</b> | <b>CCP (ICD-9) intervention codes<sup>1</sup></b>       | <b>CCI (ICD-10) intervention codes<sup>1</sup></b>                                                                                                               |
|                          | 5693: Gastric partition for obesity                     | 1.NF.78: Repair by decreasing size, stomach                                                                                                                      |
|                          | 5694: Insertion of gastric bubble or balloon            | 1.NF.78.XP: using vertical banded technique, open approach                                                                                                       |
|                          | 5559: Partial gastrectomy with anastomosis to esophagus | 1.NF.78.EJ: using adjustable banding technique, endoscopic (laparoscopic) approach                                                                               |
|                          | 5589: Other partial gastrectomy (not specified)         | 1.NF.78.XO: using vertical banded technique, endoscopic (laparoscopic) approach                                                                                  |
|                          |                                                         | 1.NF.78.WJ: using vertical (sleeve) gastrectomy technique, open approach                                                                                         |
|                          |                                                         | 1.NF.78.GB: using vertical (sleeve) gastrectomy technique, endoscopic (laparoscopic) approach                                                                    |
|                          |                                                         | 1.NF.78.SH: using gastric bypass technique with gastroenterostomy [e.g. Roux-en-Y], open approach                                                                |
|                          |                                                         | 1.NF.78.DQ: using gastric bypass technique with gastroenterostomy [e.g. Roux-en-Y], endoscopic (laparoscopic) approach                                           |
|                          |                                                         | 1.NF.78.SJ: using gastric bypass technique with gastroenterostomy and biliopancreatic bypass [to terminal ileum] [e.g. biliopancreatic diversion], open approach |
|                          |                                                         | 1.NF.78.DO: using gastric bypass technique with gastroenterostomy and biliopancreatic bypass [to terminal ileum]                                                 |

---

[e.g. biliopancreatic diversion], endoscopic (laparoscopic) approach

1.NF.78.SI: using gastric bypass technique with enteroenterostomy and biliopancreatic bypass [to terminal ileum] [e.g. duodenal switch], open approach

NF.78.DI: using gastric bypass technique with enteroenterostomy and biliopancreatic bypass to terminal ileum] [e.g. duodenal switch], endoscopic (laparoscopic) approach

---

**Bariatric surgery**

**Medical service billing codes<sup>2</sup>**

+05114 Partial or subtotal gastrectomy with vagotomy

+05115 Partial or subtotal gastrectomy without vagotomy

+5308 Biliopancreatic diversion including gastrectomy and all digestive anastomoses

+5309 Biliopancreatic diversion including gastrectomy and all digestive anastomoses with cholecystectomy, supplement

+05355 Gastroplasty for morbid obesity

+05305 Adjustable prosthetic gastroplasty including, when necessary, repair of hiatus hernia by closure of esophageal hiatus with diaphragmatic pillars plication and installation of subcutaneous reservoir and of its ulterior calibration.

+05527 Revision or exeresis of adjustable prosthetic and/or of catheter and its reservoir, all techniques, all approaches, under general anaesthesia.

+05526 Vertical sleeve gastrectomy for morbid obesity, all techniques, all approaches.

+05306 Gastric by-pass Roux-in-Y including all digestive anastomoses.

+05528 Second surgeon.

---

CCI, Canadian Classification of Interventions; CCP, Canadian Classification of Diagnostic, Therapeutic, and Surgical procedures; ICD-9-CM, International Classification of Diseases, 9<sup>th</sup> Revision, Clinical Modification; ICD-10-CA, International Classification of Diseases, 10<sup>th</sup> Revision, Canada. <sup>1</sup> In the hospital discharges database (Med-Echo). <sup>2</sup> In the physician-billing claims database (PCD).

**Appendix 2. Baseline characteristics of the patients by type of bariatric procedure (for the period between 2006 and 2014)**

| <b>Characteristics</b>                                              | <b>Adjustable gastric banding<br/>(n=3,887)</b> | <b>Sleeve gastrectomy<br/>(n=2,554)</b> | <b>Roux-en-Y gastric bypass<br/>(n=873)</b> | <b>Biliopancreatic diversion<br/>(n=1,986)</b> | <b>P value<sup>1</sup></b> |
|---------------------------------------------------------------------|-------------------------------------------------|-----------------------------------------|---------------------------------------------|------------------------------------------------|----------------------------|
| Duration of follow-up, years                                        | 3.1 (1.8-4.8)                                   | 1.3 (0.6-2.5)                           | 2.7 (1.1-5.2)                               | 4.4 (2.5-6.1)                                  |                            |
| Women                                                               | 2,894 (74.4)                                    | 1,768 (60.2)                            | 622 (71.2)                                  | 1,385 (69.7)                                   | <0.001                     |
| Age, years                                                          | 42.7 (11.6)                                     | 45.0 (11.4)                             | 43.3 (10.5)                                 | 42.7 (10.7)                                    | <0.001                     |
| Area of residence                                                   |                                                 |                                         |                                             |                                                | <0.001                     |
| Montreal census metropolitan area                                   | 1,762 (45.3)                                    | 931 (36.5)                              | 440 (50.4)                                  | 165 (8.3)                                      |                            |
| Other census metropolitan area (≥100 000 inhabitants)               | 390 (10.0)                                      | 562 (22.0)                              | 96 (11.0)                                   | 819 (41.2)                                     |                            |
| Census agglomeration areas (between 10,000 and 100,000 inhabitants) | 978 (25.2)                                      | 403 (15.8)                              | 145 (16.6)                                  | 367 (18.5)                                     |                            |
| Small towns and rural areas                                         | 750 (19.3)                                      | 652 (25.5)                              | 192 (22.0)                                  | 624 (31.4)                                     |                            |
| Missing                                                             | 7 (0.2)                                         | 6 (0.2)                                 | 0 (0.0)                                     | 11 (0.6)                                       |                            |
| Material deprivation <sup>2</sup> , quintile                        |                                                 |                                         |                                             |                                                | 0.02                       |
| Q1 (more privileged)                                                | 508 (13.1)                                      | 285 (11.2)                              | 79 (9.0)                                    | 251 (12.6)                                     |                            |
| Q2                                                                  | 744 (19.1)                                      | 442 (17.3)                              | 161 (18.4)                                  | 357 (18.0)                                     |                            |
| Q3                                                                  | 782 (20.1)                                      | 525 (20.6)                              | 184 (21.1)                                  | 398 (20.0)                                     |                            |
| Q4                                                                  | 883 (22.7)                                      | 547 (21.4)                              | 194 (22.2)                                  | 423 (21.3)                                     |                            |
| Q5 (more disadvantaged)                                             | 848 (21.8)                                      | 638 (25.0)                              | 222 (25.4)                                  | 484 (24.4)                                     |                            |
| Missing                                                             | 122 (3.1)                                       | 117 (4.6)                               | 33 (3.8)                                    | 73 (3.7)                                       |                            |
| Social deprivation <sup>2</sup> , quintile                          |                                                 |                                         |                                             |                                                | 0.002                      |
| Q1 (more privileged)                                                | 766 (19.7)                                      | 473 (18.5)                              | 134 (15.3)                                  | 405 (20.4)                                     |                            |
| Q2                                                                  | 782 (20.1)                                      | 490 (19.2)                              | 129 (14.8)                                  | 407 (20.5)                                     |                            |
| Q3                                                                  | 751 (19.3)                                      | 508 (19.9)                              | 185 (21.2)                                  | 414 (20.8)                                     |                            |
| Q4                                                                  | 742 (19.1)                                      | 468 (18.3)                              | 186 (21.3)                                  | 348 (17.5)                                     |                            |
| Q5 (more disadvantaged)                                             | 724 (18.6)                                      | 498 (19.5)                              | 206 (23.6)                                  | 339 (17.1)                                     |                            |
| Missing                                                             | 122 (3.1)                                       | 117 (4.6)                               | 33 (3.8)                                    | 73 (3.7)                                       |                            |
| History of fracture (prior to the index date)                       | 467 (12.0)                                      | 310 (12.1)                              | 99 (11.3)                                   | 212 (10.7)                                     | <0.001                     |
| Number of comorbidities <sup>3</sup>                                |                                                 |                                         |                                             |                                                | <0.001                     |
| None                                                                | 1,341 (34.5)                                    | 696 (27.3)                              | 223 (25.5)                                  | 583 (29.4)                                     |                            |
| 1-2                                                                 | 2,094 (53.9)                                    | 1,403 (54.9)                            | 500 (57.3)                                  | 1,125 (56.6)                                   |                            |
| ≥3                                                                  | 452 (11.6)                                      | 455 (17.8)                              | 150 (17.2)                                  | 278 (14.0)                                     |                            |
| Type of comorbidities <sup>3</sup>                                  |                                                 |                                         |                                             |                                                |                            |
| Cardiovascular disease <sup>4</sup>                                 | 193 (5.0)                                       | 243 (9.5)                               | 56 (6.4)                                    | 153 (7.7)                                      | 0.002                      |
| Hypertension                                                        | 1,057 (27.2)                                    | 755 (29.6)                              | 247 (28.3)                                  | 577 (29.0)                                     | 0.44                       |

|                           |            |            |            |            |        |
|---------------------------|------------|------------|------------|------------|--------|
| Chronic pulmonary disease | 641 (16.5) | 469 (18.4) | 172 (19.7) | 361 (18.2) | 0.42   |
| Diabetes                  | 976 (25.1) | 966 (37.8) | 367 (42.0) | 737 (37.1) | <0.001 |
| Hypothyroidism            | 247 (6.3)  | 173 (6.8)  | 57 (6.5)   | 112 (5.6)  | 0.11   |
| Renal failure             | 27 (0.7)   | 68 (2.7)   | 11 (1.3)   | 20 (1.0)   | <0.001 |
| Depression                | 826 (21.3) | 587 (23.0) | 201 (23.0) | 382 (19.2) | 0.03   |
| Osteoporosis              | 19 (0.5)   | 23 (0.9)   | 5 (0.5)    | 7 (0.4)    | 0.12   |

Data are presented as n (%), mean (SD) or median (IQR). <sup>1</sup> For the difference between groups using chi-squared test for age and sex and univariate conditional multinomial regression for other characteristics. <sup>2</sup> Based on six socio-economic indicators: the education level, the employment rate, the average income of the population, the living status (alone or not), the marital status, and the proportion of single-parent families in the population. <sup>3</sup> In the past five years. <sup>4</sup> Includes heart failure, cardiac arrhythmias, valvular disease, pulmonary circulation disorders, peripheral vascular disorders.
